# Supplementary material for: Dapagliflozin reduces albuminuria over 2 years in patients with type 2 diabetes mellitus and renal impairment
Source: Springer Nature journal article supplement (doi:10.1007/s00125-016-4017-1), 2016-06-15
Supplement: MOESM1 [file 10264374]

## Electronic supplementary material

**ESM Table 1: Demographics and baseline characteristics**

|                                                             | <b>DAPA 10 mg<br/>(n=56)</b> | <b>DAPA 5 mg<br/>(n=53)</b> | <b>Placebo<br/>(n=57)</b>      |
|-------------------------------------------------------------|------------------------------|-----------------------------|--------------------------------|
| <b>Age, years</b>                                           | 68 (8.4)                     | 65 (9.8)                    | 66 (8.3)                       |
| <b>Age categorization, n (%)</b>                            |                              |                             |                                |
| <65 years                                                   | 19 (33.9)                    | 24 (45.3)                   | 27 (47.4)                      |
| ≥65 and <75 years                                           | 25 (44.6)                    | 24 (45.3)                   | 19 (33.3)                      |
| ≥75 years                                                   | 12 (21.4)                    | 5 (9.4)                     | 11 (19.3)                      |
| <b>Race, n (%)</b>                                          |                              |                             |                                |
| White                                                       | 50 (89.3)                    | 41 (77.4)                   | 46 (80.7)                      |
| Asian                                                       | 2 (3.6)                      | 1 (1.9)                     | 5 (8.8)                        |
| Black/African-American                                      | 3 (5.4)                      | 5 (9.4)                     | 0 (0)                          |
| Other                                                       | 1 (1.8)                      | 6 (11.3)                    | 6 (10.5)                       |
| <b>Male, n (%)</b>                                          | 44 (78.6)                    | 36 (67.9)                   | 36 (63.2)                      |
| <b>HbA<sub>1c</sub></b>                                     |                              |                             |                                |
| %                                                           | 8.3 (1.0)                    | 8.3 (1.0)                   | 8.6 (1.3)                      |
| mmol/mol                                                    | 67 (11.0)                    | 67 (11.0)                   | 70 (14.1)                      |
| <b>Body mass index, kg/m<sup>2</sup></b>                    | 32.4 (5.7)                   | 33.0 (5.4)                  | 32.2 (6.4)                     |
| <b>Systolic blood pressure, mmHg</b>                        | 137.3 (17.7)                 | 135.7 (18.5)                | 133.3 (14.1) <sup>a</sup>      |
| <b>Diastolic blood pressure, mmHg</b>                       | 75.1 (9.7)                   | 74.3 (9.3)                  | 74.6 (10.1) <sup>a</sup>       |
| <b>Duration of T2DM, years</b>                              | 18.2 (10.1)                  | 18.5 (8.5)                  | 17.0 (9.6)                     |
| <b>UACR, mg/mmol, median (range)</b>                        | 20.2 (3.6–541.5)             | 44.9 (3.5–561.6)            | 20.3 (3.4–1046.6) <sub>a</sub> |
| <b>Proportion of patients with macro albuminuria, n (%)</b> | 22 (39.3)                    | 30 (56.6)                   | 24 (42.1)                      |
| <b>eGFR, ml/min/1.73 m<sup>2</sup></b>                      | 44.1 (11.1)                  | 43.9 (9.0)                  | 45.1 (9.4) <sup>a</sup>        |
| <b>Uric acid, μmol/l</b>                                    | 423 (95)                     | 425 (118)                   | 410 (117) <sup>a</sup>         |
| <b>Pre-enrolment anti-hyperglycaemic therapy, n (%)</b>     |                              |                             |                                |
| Insulin-based regimen                                       | 35 (62.5)                    | 36 (67.9)                   | 38 (66.7)                      |
| SU-based regimen                                            | 16 (28.6)                    | 11 (20.8)                   | 15 (26.3)                      |
| TZD-based regimen                                           | 1 (1.8)                      | 1 (1.9)                     | 1 (1.8)                        |
| Other regimen                                               | 4 (7.1)                      | 5 (9.4)                     | 3 (5.3)                        |
| <b>Pre-enrolment CV therapy, n (%)</b>                      |                              |                             |                                |
| ACEi/ARB therapy                                            | 46 (82.1)                    | 45 (84.9)                   | 51 (89.5)                      |
| Diuretics, overall                                          | 36 (64.3)                    | 34 (64.2)                   | 29 (50.9)                      |
| Loop diuretics                                              | 16 (28.6)                    | 20 (37.7)                   | 18 (31.6)                      |
| <b>Pre-enrolment medical history, n (%)</b>                 |                              |                             |                                |
| Diabetic retinopathy                                        | 21 (37.5)                    | 26 (49.1)                   | 21 (36.8)                      |
| Hypertension                                                | 54 (96.4)                    | 50 (94.3)                   | 51 (89.5)                      |
| Coronary artery disease                                     | 18 (32.1)                    | 18 (34.0)                   | 20 (35.1)                      |

Data are mean (SD) unless otherwise stated. <sup>a</sup>Placebo group: n=56 for baseline UACR, eGFR, systolic, uric acid and diastolic blood pressure. ACEi, angiotensin converting-enzyme inhibitor; ARB, angiotensin receptor blocker; CV, cardiovascular; DAPA, dapagliflozin; eGFR, estimated glomerular filtration rate; SU, sulfonylurea; T2DM, type 2 diabetes mellitus; TZD, thiazolidinedione; UACR, urinary albumin:creatinine ratio.

**ESM Table 2: Adverse events over 104 weeks**

|                                                             | <b>DAPA 10mg<br/>(n=56)</b> | <b>DAPA 5 mg<br/>(n=53)</b> | <b>Placebo<br/>(n=57)</b> |
|-------------------------------------------------------------|-----------------------------|-----------------------------|---------------------------|
| <b>Overall AEs and SAEs</b>                                 |                             |                             |                           |
| <b>≥1 AE<sup>a</sup></b>                                    | 50 (89.3)                   | 50 (94.3)                   | 53 (93.0)                 |
| <b>AE leading to discontinuation<sup>a,b</sup></b>          | 8 (14.3)                    | 12 (22.6)                   | 19 (33.3)                 |
| <b>≥1 hypoglycaemia<sup>c</sup></b>                         | 22 (39.3)                   | 24 (45.3)                   | 31 (54.4)                 |
| <b>Hypoglycaemia leading to discontinuation<sup>c</sup></b> | 0 (0)                       | 0 (0)                       | 1 (1.8)                   |
| <b>≥1 SAE<sup>a</sup></b>                                   | 20 (35.7)                   | 14 (26.4)                   | 18 (31.6)                 |
| <b>SAE leading to discontinuation</b>                       | 2 (3.6)                     | 5 (9.4)                     | 5 (8.8)                   |
| <b>Death</b>                                                | 3 (5.4)                     | 1 (1.9)                     | 4 (7.0)                   |
| <b>AEs and SAEs of renal function<sup>d</sup></b>           |                             |                             |                           |
| <b>AEs of renal function</b>                                | 6 (10.7)                    | 1 (1.9)                     | 2 (3.5)                   |
| <b>Blood creatinine increased</b>                           | 3 (5.4)                     | 0 (0)                       | 1 (1.8)                   |
| <b>Renal failure</b>                                        | 0 (0)                       | 1 (1.9)                     | 1 (1.8)                   |
| <b>Renal failure chronic</b>                                | 1 (1.8)                     | 0 (0)                       | 0 (0)                     |
| <b>Renal impairment</b>                                     | 2 (3.6)                     | 0 (0)                       | 0 (0)                     |
| <b>SAEs of renal function</b>                               | 1 (1.8)                     | 1 (1.9)                     | 1 (1.8)                   |
| <b>Renal failure</b>                                        | 0 (0)                       | 1 (1.9)                     | 1 (1.8)                   |
| <b>Renal failure chronic</b>                                | 1 (1.8)                     | 0 (0)                       | 0 (0)                     |
| <b>AEs and SAEs of volume reduction<sup>d</sup></b>         |                             |                             |                           |
| <b>AEs of volume reduction</b>                              | 5 (8.9)                     | 5 (9.4)                     | 4 (7.0)                   |
| <b>Blood pressure decreased</b>                             | 0 (0)                       | 1 (1.9)                     | 1 (1.8)                   |
| <b>Dehydration</b>                                          | 1 (1.8)                     | 0 (0)                       | 1 (1.8)                   |
| <b>Syncope</b>                                              | 1 (1.8)                     | 0 (0)                       | 0 (0)                     |
| <b>Hypotension</b>                                          | 3 (5.4)                     | 2 (3.8)                     | 1 (1.8)                   |
| <b>Orthostatic hypotension</b>                              | 1 (1.8)                     | 2 (3.8)                     | 2 (3.5)                   |
| <b>SAEs of volume reduction</b>                             | 1 (1.8)                     | 0 (0)                       | 0 (0)                     |
| <b>Syncope</b>                                              | 1 (1.8)                     | 0 (0)                       | 0 (0)                     |

<sup>a</sup>Only hypoglycaemia reported as a SAE is included in the AE, SAE and AE leading to discontinuation summary lines. <sup>b</sup>The most common AEs that led to discontinuation were related to the preferred terms of hyperkalaemia (4, 4 and 8 events registered in the dapagliflozin 10mg, dapagliflozin 5mg and placebo groups, respectively) and increased blood potassium (0, 1 and 6 events registered, respectively). <sup>c</sup>All reported hypoglycaemia events are included in the hypoglycaemia line. <sup>d</sup>Based on a predefined list of events of renal impairment /volume reduction. AE, adverse event; DAPA, dapagliflozin; SAE, serious adverse event.

**ESM Fig. 1: Placebo-corrected per cent change in albuminuria with/without adjustment for sex and changes in HbA<sub>1c</sub>, systolic and diastolic blood pressure, uric acid and eGFR at 104 weeks**

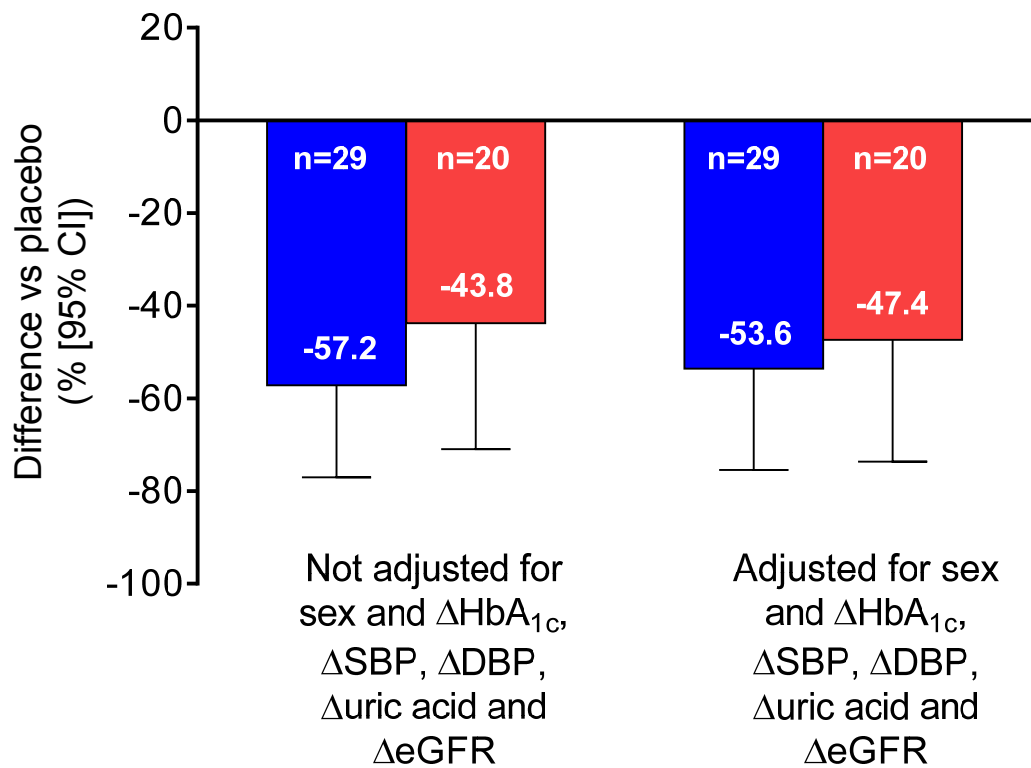

DBP, diastolic blood pressure; eGFR, estimated glomerular filtration rate; SBP, systolic blood pressure.

Blue bars represent dapagliflozin 10mg and red bars represent dapagliflozin 5mg.

**ESM Fig. 2: Patients (%) shifting UACR level from baseline to 104 weeks**

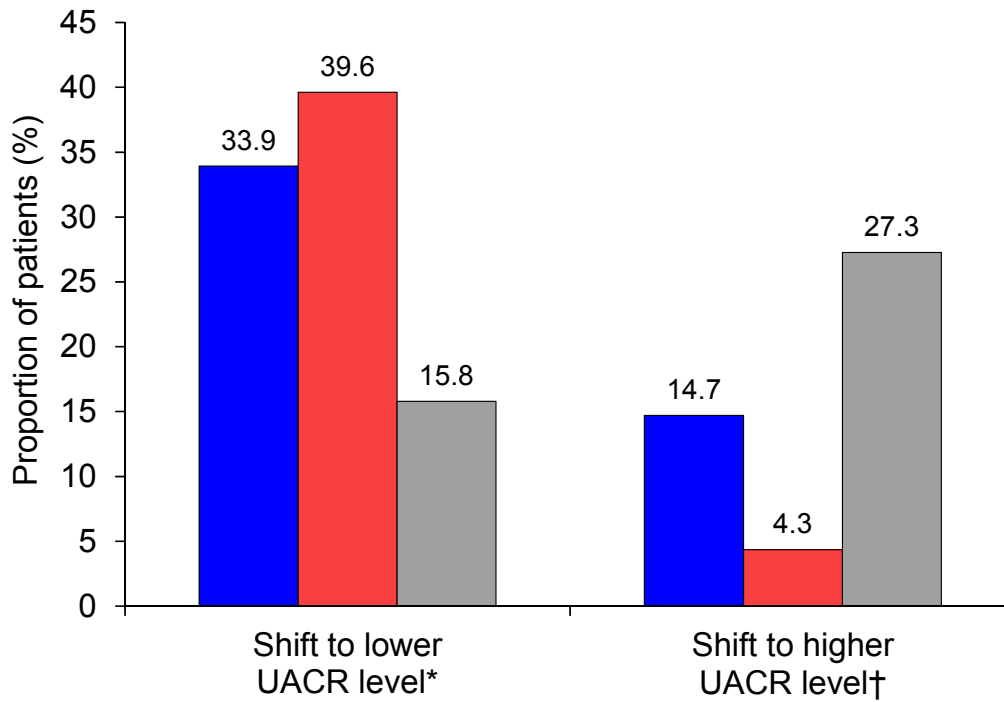

UACR, urinary albumin:creatinine ratio. Placebo: n=57; Dapagliflozin 5 mg: n=53; Dapagliflozin 10 mg: n=56. \*Patients shifting from micro- to normoalbuminuria or from macro- to micro- or normoalbuminuria. †Patients shifting from micro- to macroalbuminuria.

Blue bars represent dapagliflozin 10mg, red bars represent dapagliflozin 5mg and grey bars represent placebo.

**ESM Fig. 3: Mean change in eGFR over 104 weeks**

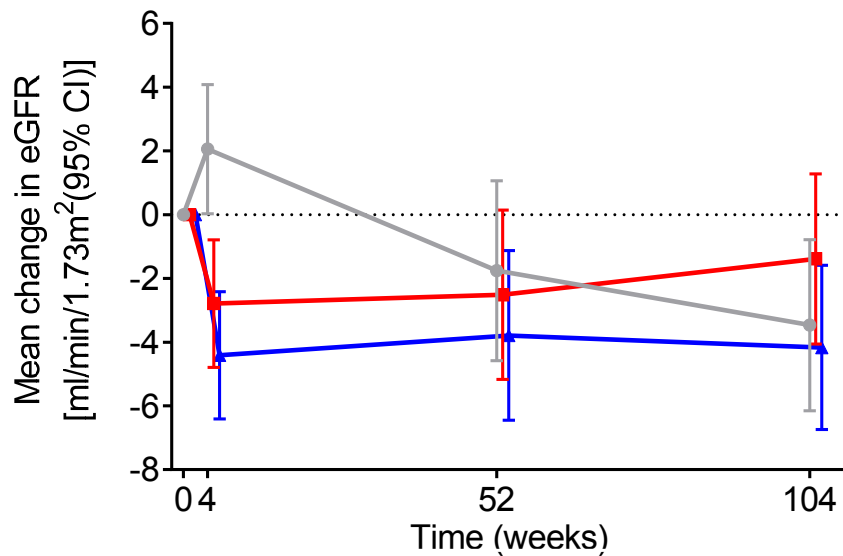

| Patients per time point |       |
|-------------------------|-------|
| PBO                     | 56 50 |
| DAPA 5 mg               | 53 52 |
| DAPA 10 mg              | 56 52 |

| BL eGFR, mL/min/1.73m <sup>2</sup> |      |
|------------------------------------|------|
|                                    | 45.1 |
|                                    | 43.9 |
|                                    | 44.1 |

Adjusted mean change in eGFR at Week 104 for DAPA 10 mg: -4.2 (-6.7, -1.6); DAPA 5 mg: -1.4 (-4.1, 1.3) and PBO: -3.5 (-6.2, -0.8)

Difference vs placebo (95% CI) in eGFR at Week 104 for DAPA 10mg: -0.7 ml/min/1.73 m<sup>2</sup> (-4.0, 2.6); DAPA 5 mg: 2.1 ml/min/1.73 m<sup>2</sup> (-1.3, 5.5). DAPA, dapagliflozin; eGFR, estimated glomerular filtration rate; PBO, placebo.

Blue triangles represent data points for dapagliflozin 10mg, red squares for dapagliflozin 5mg and grey circles for placebo.
